# Supplementary material
Source: HighWire-hosted journal article supplement (https://ejhp.bmj.com/highwire/filestream/150670/field_highwire_adjunct_files/0/ejhpharm-2021-002877supp001_data_supplement.pdf)
Supplement: ejhpharm-2021-002877supp001_data_supplement.pdf [file ejhpharm-2021-002877supp001_data_supplement.pdf]

## Supplemental Material- Tables

Supplemental table 1. Thromboprophylaxis protocol in COVID-19 admitted patients.

| Characteristics of anticoagulation prior to admission and thrombotic risk | Recommendation                                                                     |                                                              |
|---------------------------------------------------------------------------|------------------------------------------------------------------------------------|--------------------------------------------------------------|
| <b>Patients chronically anticoagulated:</b>                               |                                                                                    |                                                              |
| VKA                                                                       | Continue treatment. If absolute diet and/or general deterioration, change to LMWH. |                                                              |
| DOAC                                                                      | Maintain the same if no outstanding interactions.                                  |                                                              |
| <b>Patients not previously anticoagulated, depending on the risk:</b>     |                                                                                    |                                                              |
| Standard thrombotic risk (those that do not have a high risk).            | Weight and/or clearance:                                                           | Dose:                                                        |
|                                                                           | <50 kg or elderly with clearance <15-30 ml                                         | 2.500 IU sc/day of bemiparine or 20 mg sc/day of enoxaparin. |
|                                                                           | 51-80 kg                                                                           | 40 mg sc/day of enoxaparin or 3 500 IU sc/day of bemiparine. |
|                                                                           | 81-100 kg                                                                          | 60 mg sc/day of enoxaparin                                   |
|                                                                           | >100 kg                                                                            | 80 mg sc/day of enoxaparin                                   |
| High thrombotic risk*                                                     | Weight and/or clearance:                                                           | Dose:                                                        |
|                                                                           | <50 kg or elderly with clearance <15-30 ml                                         | 3.500 IU sc/day of bemiparine or 40 mg/sc/day of enoxaparin  |
|                                                                           | 51-80 kg                                                                           | 60 mg/day/sc of enoxaparin                                   |

|                       |                           |                             |
|-----------------------|---------------------------|-----------------------------|
|                       | 81-100 kg                 | 80 mg/day/sc of enoxaparin  |
|                       | >100 kg                   | 100 mg/day/sc of enoxaparin |
| High suspicion of PTE | 1 mg/kg/12h of enoxaparin |                             |

VKA: vitamin K antagonist. DOAC: direct oral anticoagulant. LMWH: low-molecular-weight heparin. PTE: pulmonary thromboembolism. \*High thrombotic risk (any of the following criteria: severe COVID-19\*\*, D-dimer >2.000 ng/mL, first-line personal or family history of VTD, and personal history of arterial ischemic pathology [peripheral, cardiological, or neurological]). \*\*Severe COVID-19 (at least two of the following criteria: PCR >200 mg/L, D-dimer >1.000 ng/mL, IL-6 >40 pg/mL, ferritin >1.000 ng/mL, lymphocytes <0.8x10<sup>9</sup>/L).

**Supplemental table 2. Thromboprophylaxis protocol in COVID-19 patients at hospital discharge.**

| Characteristics                                                  | Recommendation                                 |                                                             |
|------------------------------------------------------------------|------------------------------------------------|-------------------------------------------------------------|
| <b>If absence of haemorrhagic risk* and score ≥4 in Padua**</b>  |                                                |                                                             |
| LMWH regimen                                                     | Weight and/or clearance:                       | Dose:                                                       |
|                                                                  | ≤50 kg or elderly with ACR <30 ml/min          | 2.500 IU sc/day of bemiparine or 20 mg sc/day of enoxaparin |
|                                                                  | 51-80 kg                                       | 40 mg sc/day of enoxaparin or 3 500 IU sc/day of bemiparine |
|                                                                  | 81-100 kg                                      | 60 mg sc/day of enoxaparin                                  |
|                                                                  | >100 kg                                        | 80 mg sc/day of enoxaparin                                  |
| Duration                                                         | Two weeks. Four weeks if high thrombotic risk. |                                                             |
| <b>If there is haemorrhagic risk and/or score of ≤4 in Padua</b> | No treatment with LMWH.                        |                                                             |

*LMWH: low-molecular-weight heparin.* \*Absence of high haemorrhagic risk: absence of active significant haemorrhage or thrombopenia <50 000/ $\mu$ l, double anti-aggregation, or active peptic ulcer in the last three months. \*\*Modified Padua score [5] (history of VTE: 3 points; thrombophilia: 3 points; active cancer: 3 points; BMI  $\geq$ 30: 1 point; chronic pulmonary disease: 1 point; acute heart failure or respiratory failure: 1 point; life-threatening rheumatological disease: 1 point; reduced mobility: 3 points; hormone therapy with oral contraceptives: 1 point, and age  $\geq$ 70 years: 1 point).

**Supplemental table 3. Basal characteristics of the subjects.**

| Variable                         | N=113                          |         |
|----------------------------------|--------------------------------|---------|
| Sex, n (%)                       | 66 (58.4) males                |         |
| Age, median (IQR)                | 70 (56-77)                     |         |
| Weight, median (IQR)             | 76.5 (68.5-84.5)               |         |
| Hypertension, n (%)              | 62 (54.9)                      |         |
| Obesity, n (%)                   | 43 (38.1)                      |         |
| Diabetes, n (%)                  | 28 (24.8)                      |         |
| Chronic pulmonary disease, n (%) | 18 (15.9)                      |         |
| Chronic kidney disease, n (%)    | 10 (8.8)                       |         |
| Immunosuppression, n (%)         | 4 (3.5)                        |         |
| Severe liver failure, n (%)      | 1 (0.9)                        |         |
| Active cancer, n (%)             | 8 (7.1)                        |         |
| Previous VTE, n (%)              |                                |         |
|                                  | If previous VTE                | 9 (8)   |
|                                  | First-degree relative with VTE | 1 (0.9) |

|                                                                                                    |                          |           |
|----------------------------------------------------------------------------------------------------|--------------------------|-----------|
| <b>History of arterial ischemic pathology (peripheral, cardiological, and neurological), n (%)</b> | 18 (15.9)                |           |
| <b>Analytical parameters at admission, median (IQR)</b>                                            |                          |           |
| D-dimer (ng/mL)                                                                                    | 792 (479-1.622)          |           |
| C-reactive protein (mg/L)                                                                          | 65 (26-142)              |           |
| Ferritin (ng/mL)                                                                                   | 402 (240-865)            |           |
| Lymphocytes ( $10^9/L$ )                                                                           | 0.9 (0.6-1.2)            |           |
| <b>Clinical characteristics at admission, n (%)</b>                                                |                          |           |
| Level of severity of pneumonia                                                                     |                          |           |
|                                                                                                    | Uncomplicated illness    | 7 (6.2)   |
|                                                                                                    | Mild pneumonia           | 72 (63.7) |
|                                                                                                    | Severe pneumonia         | 32 (28.3) |
|                                                                                                    | Sepsis                   | 2 (1.8)   |
| Level of severity of COVID-19                                                                      |                          |           |
|                                                                                                    | Severe COVID-19          | 46 (40.7) |
|                                                                                                    | Non-severe COVID-19      | 66 (58.4) |
| Thrombotic risk                                                                                    |                          |           |
|                                                                                                    | Standard thrombotic risk | 50 (44.2) |
|                                                                                                    | High thrombotic risk     | 62 (54.9) |

|                                                        |           |         |
|--------------------------------------------------------|-----------|---------|
| <b>Anticoagulation prior to admission, n (%)</b>       | 18 (15.9) |         |
| <b>Anticoagulant therapy prior to admission, n (%)</b> |           |         |
|                                                        | DOAC      | 6 (5.3) |
|                                                        | VKA       | 8 (7.1) |
|                                                        | LMWH      | 4 (3.5) |

*IQR: interquartile range; VTE: venous thromboembolic events; DOAC: direct oral anticoagulant; VKA: vitamin K antagonist; LMWH: low-molecular-weight heparin.*

**Supplemental table 4. Characteristics of the subjects according to the Padua Predictive Scores.**

| <b>Risk factors according to the adjusted Padua Prediction Scores</b>   | <b>N=113</b> |
|-------------------------------------------------------------------------|--------------|
| <b>VTE history, n (%) (3 points)</b>                                    | 18 (15.92)   |
| <b>Thrombophilia, n (%) (3 points)</b>                                  | 2 (1.76)     |
| <b>Active cancer, n (%) (3 points)</b>                                  | 5 (4.42)     |
| <b>BMI &gt;30, n (%) (1 point)</b>                                      | 40 (35.39)   |
| <b>Acute heart/respiratory failure, n (%) (1 point)</b>                 | 9 (7.96)     |
| <b>Chronic pulmonary disease, n (%) (1 point) (1 point)</b>             | 17 (0.44)    |
| <b>Life-threatening rheumatological disease, n (%), n (%) (1 point)</b> | 4 (3.53)     |
| <b>Therapy with oral contraceptives, n (%), n (%)</b>                   | 0            |
| <b>Reduced mobility, n (%) (3 points)</b>                               | 26 (23)      |
| <b>Age &gt;70 years, n (%)</b>                                          | 42 (37.16)   |
